# Supplementary material
Source: publisher figshare collection journal article supplement (https://gsajournals.figshare.com/ndownloader/files/12428960)
Supplement: Supplementary file 1 [file 12428960]

| Primer Name | Sequence | Position1 | Position2 | Orientation |
| --- | --- | --- | --- | --- |
| B1F | CTAATCTCGATTGGGGGACA | CFA15g.2,866,246 | CFA15g.2,866,265 | + |
| B1R | GCAACCATTTCACCTCACCT | CFA15g.2,866,547 | CFA15g.2,866,566 | - |
| GF | GCATCCACTTAGGCACGTTT | CFA15g.2,874,608 | CFA15g.2,874,608 | - |
| GR | GAACACACACTGGGCTTTCC | CFA15g.2,875,514 | CFA15g.2,875,533 | + |
| B2F | TGGAATTCACGACTGTGGAC | CFA15g.2,876,901 | CFA15g.2,876,920 | + |
| B2R | TCTGCTGTACCAAATGAAGACA | CFA15g.2,877,914 | CFA15g.2,877,935 | - |
| LF | GAATCTCTAAGGCCCGATCC | CFA15g.2,873,960 | CFA15g.2,873,979 | + |
| LR1 | TGTCCACTCATGGCACAAAT | CFA15g.2,878,741 | CFA15g.2,878,760 | - |
| LR2 | GCAACCATTTCACCTCACCT | CFA15g.2,866,547 | CFA15g.2,866,566 | - |
| T4F | CTAATCTCGATTGGGGGACA | *PPT1*_c.406 | *PPT1_*c.425 | + |
| T6R | CCAGTACTCTGCTTGCACCA | *PPT1_*c.539 | *PPT1*_c.558 | - |
